# Supplementary material for: Commercial process for the recovery of metals from ITO etching industry wastewater by liquid–liquid extraction: simulation, analysis of mechanism, and mathematical model to predict optimum operational conditions
Source: Royal Society of Chemistry journal article supplement (doi:10.1039/c5gc00473j), 2015-01-01
Supplement: c5gc00473j1.pdf [file c5gc00473j1.pdf]

## Supplementary Figures

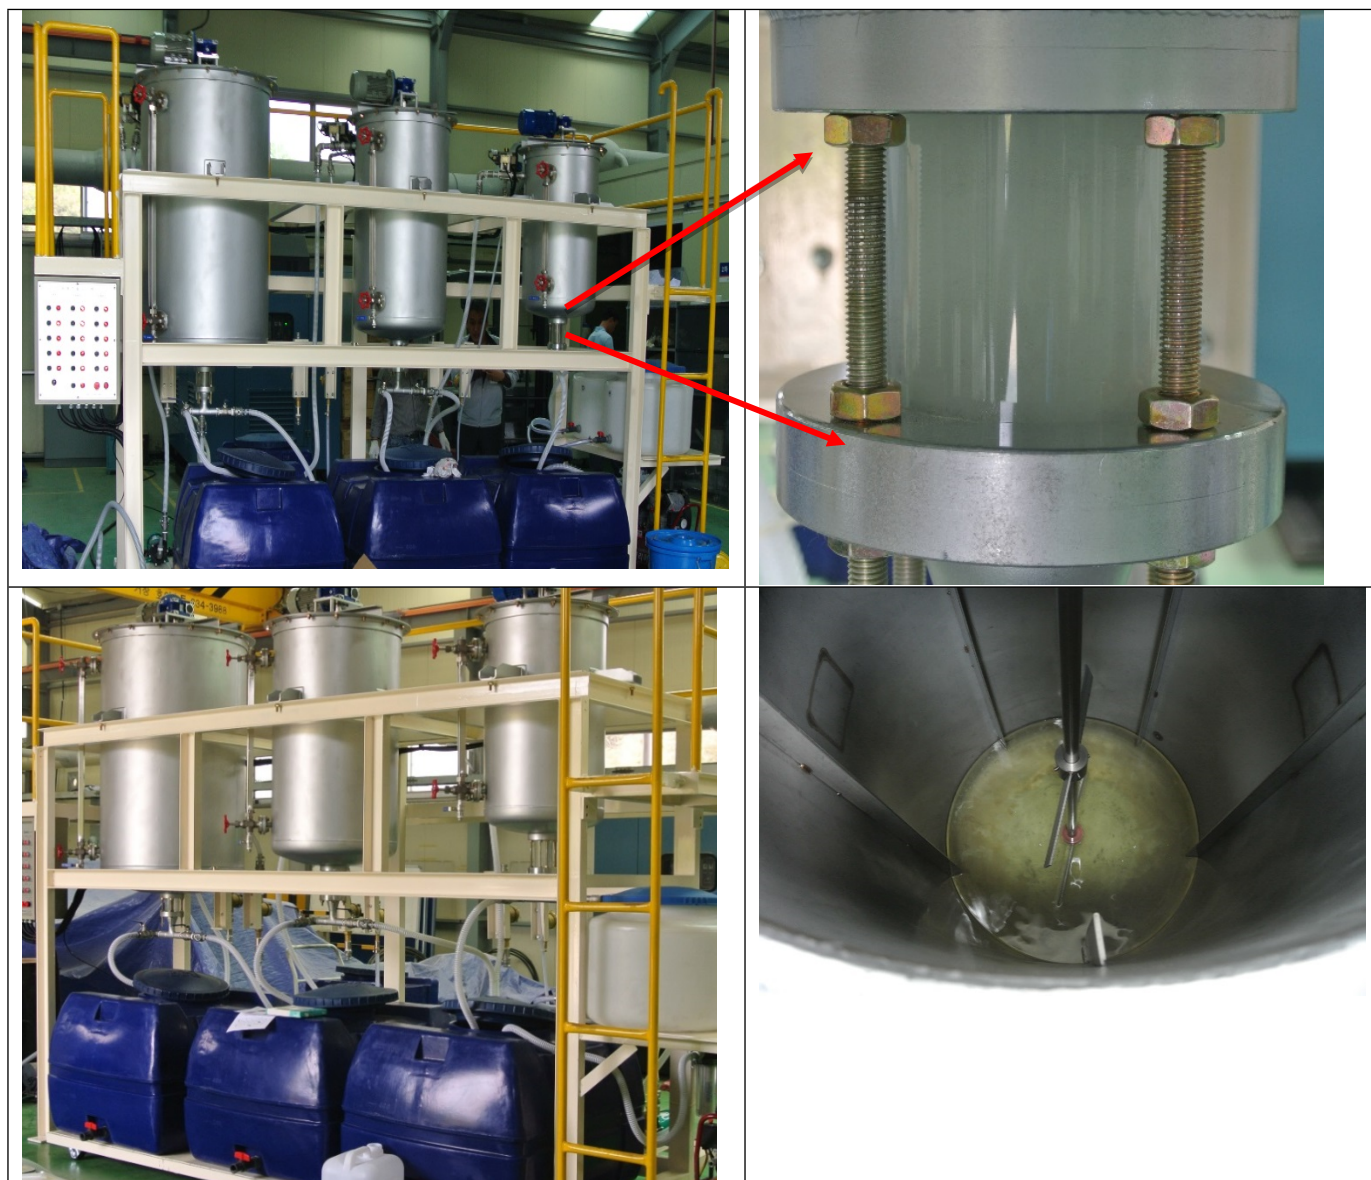

**Supplementary Fig. 1: Pilot plant view of batch process ITO etching industry wastewater treatment plant: (a) and (c) view of plant, (b) transparent window to watch liquid-liquid separation, and (d) inside view of the baffle mixture reactor.**

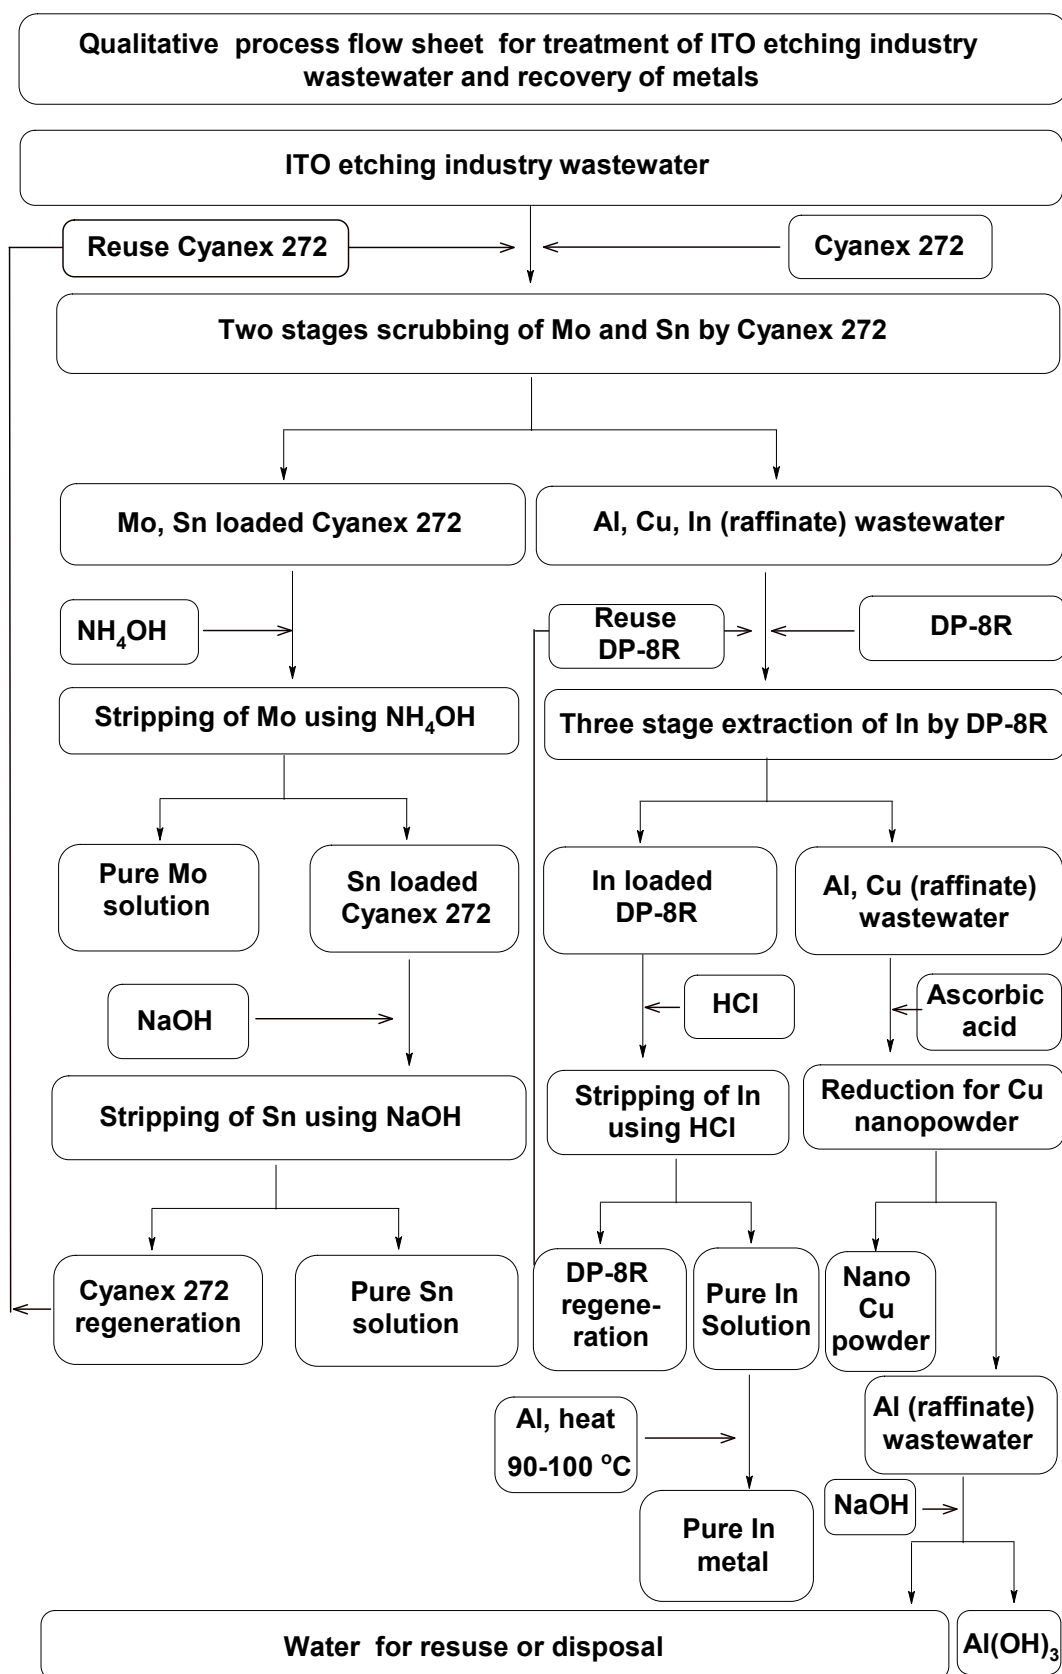

**Supplementary Fig.2: Qualitative process flow sheet for the treatment of indium-tin-oxide (ITO) etching wastewater and total recovery of metal values.**
